# Supplementary material
Source: PubMed Central journal article supplement (PMC4004228)
Supplement: bi5002807_si_001.pdf [file bi5002807_si_001.pdf]

## Supporting Information

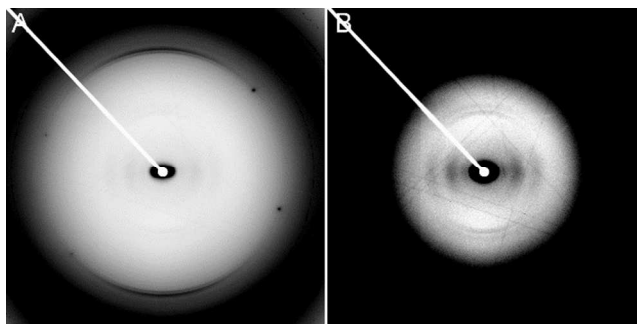

Figure S1. Fiber diffraction from a HET-s(218-289) oriented sol. Diffraction patterns are scaled to show (A) wide-angle diffraction and (B) low-angle diffraction.

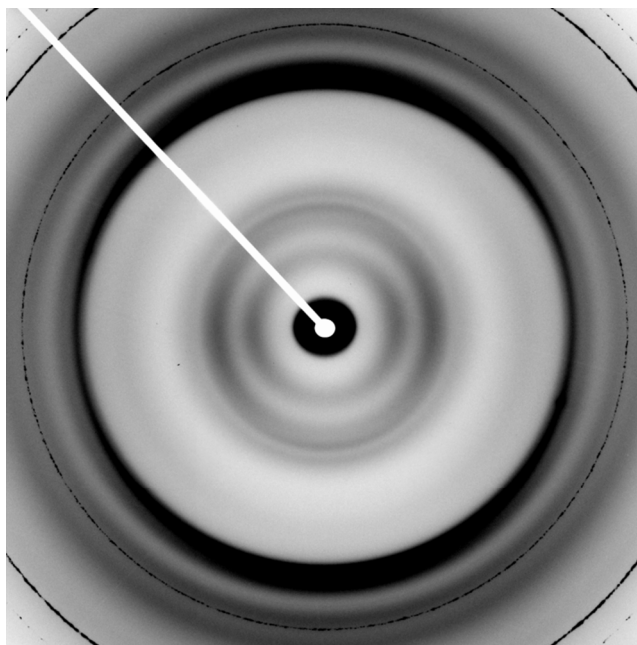

Figure S2. X-ray fiber diffraction from lyophilized and rehydrated HET-s(218-289).
